# Supplementary material
Source: publisher figshare collection journal article supplement (https://brill.figshare.com/ndownloader/files/24446351)
Supplement: Supplementary file 1 [file 24446351]

## Sheet: Raw Data-Auld, HL & Godin, J-G
Treatment	ViewingTimeViewer	ViewingTimeNonViewer	TotalTimeViewing	PropTimeViewingViewer	TimeNearCenterViewer	TimeNearCenterNonViewer	ChoiceTimeViewer	ChoiceTimeNonViewer	TotalTimeChoice	PropChoiceTimeViewer	CourtshipDisplays	FemaleLength	FocalMaleLength	FocalMaleColourScore	ViewerMaleLength	ViewerMaleColourScore	NonViewerMaleLength	NonViewerMaleColourScore	DitherMaleLength	DitherMaleColourScore	ControlStimulusMaleLength	ControlStimulusMaleColourScore
1	138	119	257	0.536965	461	17	1140	6	1146	0.994764	55	22.4282	15.0241	0.0982508	14.859	0.0557252	14.859	0.0637388	13.4366	0.0939201	NA	NA
1	195	198	393	0.496183	586	4	1036	132	1168	0.886986	16	22.3139	13.7541	0.0594937	15.0241	0.0671141	14.1097	0.0568421	13.7033	0.0514673	NA	NA
1	84	218	302	0.278146	560	34	175	829	1004	0.174303	9	21.082	17.653	0.0503941	20.3327	0.0960536	19.2405	0.0411317	16.1544	0.0714964	NA	NA
1	135	176	311	0.434084	552	29	482	454	936	0.514957	17	19.6088	14.7193	0.0517516	15.9893	0.070442	14.7447	0.0527532	18.1737	0.0485535	NA	NA
1	253	68	321	0.788162	323	336	766	88	854	0.896956	6	20.8	15.41	0.0286391	15.86	0.0699287	16.23	0.0807942	15.11	0.0459418	NA	NA
1	38	258	296	0.128378	401	114	529	465	994	0.532193	1	20.69	18.33	0.0373018	18.07	0.0632025	18.19	0.0374946	18.05	0.103974	NA	NA
1	114	197	311	0.366559	450	226	352	634	986	0.356998	1	21.43	15.84	0.030602	16.14	0.0484599	16.21	0.0575389	16.11	0.0393236	NA	NA
1	319	46	365	0.873973	497	58	1031	110	1141	0.903593	1	24.65	18.54	0.0382506	17.65	0.0589808	18.61	0.026033	16.14	0.0502274	NA	NA
1	353	41	394	0.895939	548	264	395	662	1057	0.373699	2	19.3548	12.8778	0.0349544	11.684	0.113163	12.827	0.0353614	12.6238	0.0528634	NA	NA
1	125	113	238	0.52521	NA	NA	229	726	955	0.239791	16	22.084	19.191	0.0197531	18.509	0.0502698	17.52	0.0866444	15.602	0.0537973	NA	NA
1	135	110	245	0.55102	NA	NA	605	235	840	0.720238	2	19.732	17.61	0.0391078	17.93	0.0379671	16.03	0.029016	16.487	0.053314	NA	NA
1	151	256	407	0.371007	NA	NA	854	260	1114	0.766607	7	22.8	15.607	0.0448808	17.195	0.0632013	16.35	0.0203644	15.824	0.0158237	NA	NA
1	85	59	144	0.590278	NA	NA	311	684	995	0.312563	4	24.036	15.123	0.0444468	15.99	0.0321361	16.82	0.0416777	14.212	0.0484238	NA	NA
1	307	135	442	0.69457	570	166	763	249	1012	0.753953	19	21.132	17.609	0.0168143	16.862	0.0730223	17.403	0.0888631	17.968	0.0144384	NA	NA
1	155	56	211	0.734597	496	119	526	496	1022	0.514677	7	21.134	16.898	0.0754287	16.951	0.0763438	17.293	0.0514983	15.436	0.0130202	NA	NA
2	64	295	359	0.178273	238	22	236	527	763	0.309305	0	21.4376	15.9131	0.0787725	18.5293	0.0957265	14.6812	0.0480151	14.7701	0.0989054	NA	NA
2	25	148	173	0.144509	226	151	149	850	999	0.149149	0	18.1229	14.5288	0.0750293	14.1351	0.0568973	14.1351	0.0503018	13.3858	0.0737517	NA	NA
2	120	250	370	0.324324	453	189	260	842	1102	0.235935	0	17.4498	15.3924	0.0852483	12.5095	0.0586387	16.1036	0.113527	15.8877	0.0436696	NA	NA
2	321	101	422	0.760664	590	262	273	404	677	0.40325	0	18.1102	15.8496	0.0811594	14.7066	0.0696707	18.3896	0.060751	15.8242	0.0334405	NA	NA
2	205	178	383	0.535248	280	314	339	656	995	0.340704	0	16.4084	13.5001	0.0825243	13.1699	0.0332136	17.4752	0.0451169	14.4272	0.0531309	NA	NA
2	93	170	263	0.353612	530	55	366	553	919	0.398259	0	22.4	15.74	0.0385825	16.77	0.0467219	15.67	0.087582	17.43	0.0365169	NA	NA
2	250	121	371	0.673854	206	118	270	632	902	0.299335	0	27.44	16.09	0.0285235	17.04	0.0774487	16.75	0.0398374	15.52	0.0702432	NA	NA
2	202	251	453	0.445916	395	78	150	678	828	0.181159	0	24.93	16.3	0.0420497	16.62	0.0193574	17.17	0.0590977	16.04	0.0833519	NA	NA
2	143	204	347	0.412104	439	161	86	785	871	0.0987371	0	22.98	15.24	0.0468206	16.26	0.0272374	15.99	0.0594019	17.49	0.0447932	NA	NA
2	197	149	346	0.569364	431	93	412	662	1074	0.383613	0	19.91	18.04	0.0421668	17.35	0.0418089	15.54	0.0691188	16.68	0.0425809	NA	NA
2	57	304	361	0.157895	NA		325	432	757	0.429326	0	20.637	16.095	0.01772	16.588	0.0741913	16.083	0.00865679	15.625	0.0549701	NA	NA
2	4	316	320	0.0125	NA		158	786	944	0.167373	0	21.595	16.918	0.0894035	16.432	0.0400364	16.493	0.0398533	17.377	0.0417352	NA	NA
2	182	2	184	0.98913	NA		452	219	671	0.673621	0	24.053	17.503	0.00932567	18.274	0.0129363	18.894	0.00720662	17.49	0.0407743	NA	NA
2	460	56	516	0.891473	NA		403	504	907	0.444322	0	22.884	16.846	0.0177535	17.244	0.0306054	17.56	0.0345287	16.525	0.03584	NA	NA
2	165	311	476	0.346639	91	359	142	625	767	0.185137	0	20.628	16.922	0.0158427	16.254	0.0410544	17.162	0.0582166	16.403	0.022204	NA	NA
2	176	349	525	0.335238	598	339	387	566	953	0.406086	0	21.033	16.754	0.076302	18.536	0.0649207	17.786	0.0287666	16.275	0.00834489	NA	NA
2	357	87	444	0.804054	272	143	264	757	1021	0.25857	0	24.659	18.265	0.0101026	17.357	0.0336507	16.962	0.0294794	16.935	0.028719	NA	NA
2	381	93	474	0.803797	422	88	674	259	933	0.722401	0	22.43	20.467	0.0188225	17.625	0.0649086	18.366	0.0261968	17.749	0.0065856	NA	NA
3	99	299	398	0.248744	392	66	315	841	1156	0.272491	0	NA	15.838	0.0736354	17.911	0.136792	18.062	0.120426	17.164	0.0380166	16.531	0.0576004
3	473	32	505	0.936634	554	231	4	1137	1141	0.0035057	0	NA	16.873	0.0524447	15.932	0.057922	17.488	0.0325065	16.052	0.0243681	16.353	0.0465506
3	339	73	412	0.822816	467	69	332	718	1050	0.31619	0	NA	14.97	0.0414308	15.99	0.0420552	16.69	0.0563682	15.91	0.0447576	16.3	0.063817
3	210	173	383	0.548303	398	43	404	451	855	0.472515	0	NA	19.24	0.0415675	17.86	0.0314076	18.09	0.0246531	17.96	0.0328881	16.9	0.0263447
3	141	211	352	0.400568	485	113	222	651	873	0.254296	0	NA	16.43	0.042429	16.02	0.0392698	16.23	0.060512	14.77	0.0439405	16.68	0.0638501
3	134	204	338	0.39645	594	2	445	358	803	0.554172	0	NA	17.03	0.0366248	17.55	0.0250166	16.71	0.0251293	17.73	0.0425218	17.37	0.0291391
3	189	45	234	0.807692	538	280	242	445	687	0.352256	0	NA	17.39	0.0165946	18.22	0.0406581	18.48	0.0342927	17.15	0.0567717	18.05	0.0472517
3	18	397	415	0.0433735	590	380	51	950	1001	0.0509491	0	NA	18.76	0.0452885	15.55	0.0680199	16.6	0.0436267	19.31	0.0647152	17.78	0.0479506
3	98	307	405	0.241975	NA	NA	478	611	1089	0.438935	0	NA	15.59	0.0805938	15.81	0.0771063	15.79	0.0915226	16.5	0.037842	16.61	0.0618697
3	305	38	343	0.889213	550	0	81	1014	1095	0.0739726	0	NA	15.4	0.0267223	15.8	0.0475519	15.53	0.0462963	15.04	0.0612889	16.6	0.0549155
3	240	224	464	0.517241	412	396	9	1159	1168	0.00770548	0	NA	17.02	0.0300711	15.22	0.0423167	15.53	0.122736	16.49	0.0328612	15.21	0.0574142
3	274	216	490	0.559184	600	249	165	807	972	0.169753	0	NA	16.51	0.0545455	15.82	0.0654661	17.03	0.0617916	15.36	0.039271	16.34	0.0946985
3	163	61	224	0.727679	347	391	448	653	1101	0.406903	0	NA	16.78	0.0694215	16.37	0.036598	16.5	0.0394452	16.18	0.0443925	16.19	0.072549
3	339	87	426	0.795775	425	69	776	340	1116	0.695341	0	NA	17.21	0.0626609	16.89	0.068917	16.12	0.0593368	16.86	0.0516314	17.11	0.0993
3	340	97	437	0.778032	571	22	482	564	1046	0.460803	0	NA	15.72	0.037483	16.98	0.0232226	15.4	0.0638161	18.44	0.0261554	18.78	0.105342
3	239	167	406	0.58867	564	186	387	616	1003	0.385842	0	NA	15.82	0.0549299	17.03	0.039993	17.44	0.040715	17.67	0.087534	17.26	0.0426311
3	295	98	393	0.750636	495	337	733	381	1114	0.657989	0	NA	16.41	0.0775988	15.83	0.0577769	17.87	0.0465654	16.11	0.0382962	16.05	0.034581
3	244	136	380	0.642105	488	230	598	559	1157	0.516854	0	NA	16.21	0.0648725	18.17	0.0540938	15.18	0.0621911	17.36	0.0595693	18.18	0.0338293

## Sheet: Column headings
Treatment	1 = courtship treatment, 2 = no courtship treatment, 3 = control treatment
ViewingTimeViewer	Amount of time (s) that the focal male spent in the viewing zone of the courting male during the viewing phase
ViewingTimeNonViewer	Amount of time (s) that the focal male spent in the viewing zone of the non-courting male during the viewing phase
TotalTimeViewing	Total time (s) that the focal male spent in the viewing zone of either the courting or non-courting male during the viewing phase
PropTimeViewingViewer	Proportion of total time viewing the focal male spent in the viewing zone of the courting male during the viewing phase
TimeNearCenterViewer	Amount of time (s) that the viewing male spent within 5 cm of the central container in the experimental tank during the viewing phase
TimeNearCenterNonViewer	Amount of time (s) that the non-viewing male spent within 5 cm of the central container in the experimental tank during the viewing phase
ChoiceTimeViewer	Amount of time (s) that the focal male spent in the preference zone of the courting male during the choice phase
ChoiceTimeNonViewer	Amount of time (s) that the focal male spent in the preference zone of the non-courting male during the choice phase
TotalTimeChoice	Total time (s) that the focal male spent in the preference zone of either the courting or non-courting male during the choice phase
PropChoiceTimeViewer	Proportion of total choosing time spent in the viewing compartment of the courting male during the viewing phase
CourtshipDisplays	Number of courtship displays performed by the courting male during the viewing period
FemaleLength	Standard body length of the stimulus female (mm)
FocalMaleLength	Standard body length of the focal male (mm)
FocalMaleColourScore	Proportion of the focal male's body covered by orange and black pigmentation
ViewerMaleLength	Standard body length of the courting male (mm)
ViewerMaleColourScore	Proportion of the courting male's body covered by orange and black pigmentation
NonViewerMaleLength	Standard body length of the non-courting male (mm)
NonViewerMaleColourScore	Proportion of the non-courting male's body covered by orange and black pigmentation
DitherMaleLength	Standard body length of the "dither" male (mm)
DitherMaleColourScore	Proportion of the "dither" male's body covered by orange and black pigmentation
ControlStimulusMaleLength	Standard body length of the control stimulus male (mm)
ControlStimulusMaleColourScore	Proportion of the control stimulus male's body covered by orange and black pigmentation
NA = Data not available for these two variables because the video memory cards containing the video clips of these viewing and non-viewing males were lost before the data could be transcribed.
Treatment
ViewingTimeCourter
ViewingTimeNonCourter
PropTimeViewingCourter
ChoiceTimeCourter
ChoiceTimeNonCourter
TotalTime
PropChoiceTimeCourter
CourtshipDisplays
FemaleLength
FocalMaleLength
FocalMaleColourScore
CourterMaleLength
CourterMaleColourScore
NonCourterMaleLength
NonCourterMaleColourScore
DitherMaleLength
DitherMaleColourScore
ControlStimulusMaleLength
ControlStimulusMaleColourScore
Treatment
ViewingTimeCourter
ViewingTimeNonCourter
PropTimeViewingCourter
ChoiceTimeCourter
ChoiceTimeNonCourter
TotalTime
PropChoiceTimeCourter
CourtshipDisplays
FemaleLength
FocalMaleLength
FocalMaleColourScore
CourterMaleLength
CourterMaleColourScore
NonCourterMaleLength
NonCourterMaleColourScore
DitherMaleLength
DitherMaleColourScore
ControlStimulusMaleLength
ControlStimulusMaleColourScore
Treatment
ViewingTimeCourter
ViewingTimeNonCourter
PropTimeViewingCourter
ChoiceTimeCourter
ChoiceTimeNonCourter
TotalTime
PropChoiceTimeCourter
CourtshipDisplays
FemaleLength
FocalMaleLength
FocalMaleColourScore
CourterMaleLength
CourterMaleColourScore
NonCourterMaleLength
NonCourterMaleColourScore
DitherMaleLength
DitherMaleColourScore
ControlStimulusMaleLength
ControlStimulusMaleColourScore
Treatment
ViewingTimeCourter
ViewingTimeNonCourter
PropTimeViewingCourter
ChoiceTimeCourter
ChoiceTimeNonCourter
TotalTime
PropChoiceTimeCourter
CourtshipDisplays
FemaleLength
FocalMaleLength
FocalMaleColourScore
CourterMaleLength
CourterMaleColourScore
NonCourterMaleLength
NonCourterMaleColourScore
DitherMaleLength
DitherMaleColourScore
ControlStimulusMaleLength
ControlStimulusMaleColourScore
Treatment
ViewingTimeCourter
ViewingTimeNonCourter
PropTimeViewingCourter
ChoiceTimeCourter
ChoiceTimeNonCourter
TotalTime
PropChoiceTimeCourter
CourtshipDisplays
FemaleLength
FocalMaleLength
FocalMaleColourScore
CourterMaleLength
CourterMaleColourScore
NonCourterMaleLength
NonCourterMaleColourScore
DitherMaleLength
DitherMaleColourScore
ControlStimulusMaleLength
ControlStimulusMaleColourScore
Treatment
ViewingTimeCourter
ViewingTimeNonCourter
PropTimeViewingCourter
ChoiceTimeCourter
ChoiceTimeNonCourter
TotalTime
PropChoiceTimeCourter
CourtshipDisplays
FemaleLength
FocalMaleLength
FocalMaleColourScore
CourterMaleLength
CourterMaleColourScore
NonCourterMaleLength
NonCourterMaleColourScore
DitherMaleLength
DitherMaleColourScore
ControlStimulusMaleLength
ControlStimulusMaleColourScore
Treatment
ViewingTimeCourter
ViewingTimeNonCourter
PropTimeViewingCourter
ChoiceTimeCourter
ChoiceTimeNonCourter
TotalTime
PropChoiceTimeCourter
CourtshipDisplays
FemaleLength
FocalMaleLength
FocalMaleColourScore
CourterMaleLength
CourterMaleColourScore
NonCourterMaleLength
NonCourterMaleColourScore
DitherMaleLength
DitherMaleColourScore
ControlStimulusMaleLength
ControlStimulusMaleColourScore
Treatment
ViewingTimeCourter
ViewingTimeNonCourter
PropTimeViewingCourter
ChoiceTimeCourter
ChoiceTimeNonCourter
TotalTime
PropChoiceTimeCourter
CourtshipDisplays
FemaleLength
FocalMaleLength
FocalMaleColourScore
CourterMaleLength
CourterMaleColourScore
NonCourterMaleLength
NonCourterMaleColourScore
DitherMaleLength
DitherMaleColourScore
ControlStimulusMaleLength
ControlStimulusMaleColourScore
Treatment
ViewingTimeCourter
ViewingTimeNonCourter
PropTimeViewingCourter
ChoiceTimeCourter
ChoiceTimeNonCourter
TotalTime
PropChoiceTimeCourter
CourtshipDisplays
FemaleLength
FocalMaleLength
FocalMaleColourScore
CourterMaleLength
CourterMaleColourScore
NonCourterMaleLength
NonCourterMaleColourScore
DitherMaleLength
DitherMaleColourScore
ControlStimulusMaleLength
ControlStimulusMaleColourScore
Treatment
ViewingTimeCourter
ViewingTimeNonCourter
PropTimeViewingCourter
ChoiceTimeCourter
ChoiceTimeNonCourter
TotalTime
PropChoiceTimeCourter
CourtshipDisplays
FemaleLength
FocalMaleLength
FocalMaleColourScore
CourterMaleLength
CourterMaleColourScore
NonCourterMaleLength
NonCourterMaleColourScore
DitherMaleLength
DitherMaleColourScore
ControlStimulusMaleLength
ControlStimulusMaleColourScore
Treatment
ViewingTimeCourter
ViewingTimeNonCourter
PropTimeViewingCourter
ChoiceTimeCourter
ChoiceTimeNonCourter
TotalTime
PropChoiceTimeCourter
CourtshipDisplays
FemaleLength
FocalMaleLength
FocalMaleColourScore
CourterMaleLength
CourterMaleColourScore
NonCourterMaleLength
NonCourterMaleColourScore
DitherMaleLength
DitherMaleColourScore
ControlStimulusMaleLength
ControlStimulusMaleColourScore
Treatment
ViewingTimeCourter
ViewingTimeNonCourter
PropTimeViewingCourter
ChoiceTimeCourter
ChoiceTimeNonCourter
TotalTime
PropChoiceTimeCourter
CourtshipDisplays
FemaleLength
FocalMaleLength
FocalMaleColourScore
CourterMaleLength
CourterMaleColourScore
NonCourterMaleLength
NonCourterMaleColourScore
DitherMaleLength
DitherMaleColourScore
ControlStimulusMaleLength
ControlStimulusMaleColourScore
Treatment
ViewingTimeCourter
ViewingTimeNonCourter
PropTimeViewingCourter
ChoiceTimeCourter
ChoiceTimeNonCourter
TotalTime
PropChoiceTimeCourter
CourtshipDisplays
FemaleLength
FocalMaleLength
FocalMaleColourScore
CourterMaleLength
CourterMaleColourScore
NonCourterMaleLength
NonCourterMaleColourScore
DitherMaleLength
DitherMaleColourScore
ControlStimulusMaleLength
ControlStimulusMaleColourScore
Treatment
ViewingTimeCourter
ViewingTimeNonCourter
PropTimeViewingCourter
ChoiceTimeCourter
ChoiceTimeNonCourter
TotalTime
PropChoiceTimeCourter
CourtshipDisplays
FemaleLength
FocalMaleLength
FocalMaleColourScore
CourterMaleLength
CourterMaleColourScore
NonCourterMaleLength
NonCourterMaleColourScore
DitherMaleLength
DitherMaleColourScore
ControlStimulusMaleLength
ControlStimulusMaleColourScore
Treatment
ViewingTimeCourter
ViewingTimeNonCourter
PropTimeViewingCourter
ChoiceTimeCourter
ChoiceTimeNonCourter
TotalTime
PropChoiceTimeCourter
CourtshipDisplays
FemaleLength
FocalMaleLength
FocalMaleColourScore
CourterMaleLength
CourterMaleColourScore
NonCourterMaleLength
NonCourterMaleColourScore
DitherMaleLength
DitherMaleColourScore
ControlStimulusMaleLength
ControlStimulusMaleColourScore
Treatment
ViewingTimeCourter
ViewingTimeNonCourter
PropTimeViewingCourter
ChoiceTimeCourter
ChoiceTimeNonCourter
TotalTime
PropChoiceTimeCourter
CourtshipDisplays
FemaleLength
FocalMaleLength
FocalMaleColourScore
CourterMaleLength
CourterMaleColourScore
NonCourterMaleLength
NonCourterMaleColourScore
DitherMaleLength
DitherMaleColourScore
ControlStimulusMaleLength
ControlStimulusMaleColourScore
Treatment
ViewingTimeCourter
ViewingTimeNonCourter
PropTimeViewingCourter
ChoiceTimeCourter
ChoiceTimeNonCourter
TotalTime
PropChoiceTimeCourter
CourtshipDisplays
FemaleLength
FocalMaleLength
FocalMaleColourScore
CourterMaleLength
CourterMaleColourScore
NonCourterMaleLength
NonCourterMaleColourScore
DitherMaleLength
DitherMaleColourScore
ControlStimulusMaleLength
ControlStimulusMaleColourScore
Treatment
ViewingTimeCourter
ViewingTimeNonCourter
PropTimeViewingCourter
ChoiceTimeCourter
ChoiceTimeNonCourter
TotalTime
PropChoiceTimeCourter
CourtshipDisplays
FemaleLength
FocalMaleLength
FocalMaleColourScore
CourterMaleLength
CourterMaleColourScore
NonCourterMaleLength
NonCourterMaleColourScore
DitherMaleLength
DitherMaleColourScore
ControlStimulusMaleLength
ControlStimulusMaleColourScore
Treatment
ViewingTimeCourter
ViewingTimeNonCourter
PropTimeViewingCourter
ChoiceTimeCourter
ChoiceTimeNonCourter
TotalTime
PropChoiceTimeCourter
CourtshipDisplays
FemaleLength
FocalMaleLength
FocalMaleColourScore
CourterMaleLength
CourterMaleColourScore
NonCourterMaleLength
NonCourterMaleColourScore
DitherMaleLength
DitherMaleColourScore
ControlStimulusMaleLength
ControlStimulusMaleColourScore
Treatment
ViewingTimeCourter
ViewingTimeNonCourter
PropTimeViewingCourter
ChoiceTimeCourter
ChoiceTimeNonCourter
TotalTime
PropChoiceTimeCourter
CourtshipDisplays
FemaleLength
FocalMaleLength
FocalMaleColourScore
CourterMaleLength
CourterMaleColourScore
NonCourterMaleLength
NonCourterMaleColourScore
DitherMaleLength
DitherMaleColourScore
ControlStimulusMaleLength
ControlStimulusMaleColourScore
Treatment
ViewingTimeCourter
ViewingTimeNonCourter
PropTimeViewingCourter
ChoiceTimeCourter
ChoiceTimeNonCourter
TotalTime
PropChoiceTimeCourter
CourtshipDisplays
FemaleLength
FocalMaleLength
FocalMaleColourScore
CourterMaleLength
CourterMaleColourScore
NonCourterMaleLength
NonCourterMaleColourScore
DitherMaleLength
DitherMaleColourScore
ControlStimulusMaleLength
ControlStimulusMaleColourScore
Treatment
ViewingTimeCourter
ViewingTimeNonCourter
PropTimeViewingCourter
ChoiceTimeCourter
ChoiceTimeNonCourter
TotalTime
PropChoiceTimeCourter
CourtshipDisplays
FemaleLength
FocalMaleLength
FocalMaleColourScore
CourterMaleLength
CourterMaleColourScore
NonCourterMaleLength
NonCourterMaleColourScore
DitherMaleLength
DitherMaleColourScore
ControlStimulusMaleLength
ControlStimulusMaleColourScore
Treatment
ViewingTimeCourter
ViewingTimeNonCourter
PropTimeViewingCourter
ChoiceTimeCourter
ChoiceTimeNonCourter
TotalTime
PropChoiceTimeCourter
CourtshipDisplays
FemaleLength
FocalMaleLength
FocalMaleColourScore
CourterMaleLength
CourterMaleColourScore
NonCourterMaleLength
NonCourterMaleColourScore
DitherMaleLength
DitherMaleColourScore
ControlStimulusMaleLength
ControlStimulusMaleColourScore
Treatment
ViewingTimeCourter
ViewingTimeNonCourter
PropTimeViewingCourter
ChoiceTimeCourter
ChoiceTimeNonCourter
TotalTime
PropChoiceTimeCourter
CourtshipDisplays
FemaleLength
FocalMaleLength
FocalMaleColourScore
CourterMaleLength
CourterMaleColourScore
NonCourterMaleLength
NonCourterMaleColourScore
DitherMaleLength
DitherMaleColourScore
ControlStimulusMaleLength
ControlStimulusMaleColourScore
Treatment
ViewingTimeCourter
ViewingTimeNonCourter
PropTimeViewingCourter
ChoiceTimeCourter
ChoiceTimeNonCourter
TotalTime
PropChoiceTimeCourter
CourtshipDisplays
FemaleLength
FocalMaleLength
FocalMaleColourScore
CourterMaleLength
CourterMaleColourScore
NonCourterMaleLength
NonCourterMaleColourScore
DitherMaleLength
DitherMaleColourScore
ControlStimulusMaleLength
ControlStimulusMaleColourScore
Treatment
ViewingTimeCourter
ViewingTimeNonCourter
PropTimeViewingCourter
ChoiceTimeCourter
ChoiceTimeNonCourter
TotalTime
PropChoiceTimeCourter
CourtshipDisplays
FemaleLength
FocalMaleLength
FocalMaleColourScore
CourterMaleLength
CourterMaleColourScore
NonCourterMaleLength
NonCourterMaleColourScore
DitherMaleLength
DitherMaleColourScore
ControlStimulusMaleLength
ControlStimulusMaleColourScore
Treatment
ViewingTimeCourter
ViewingTimeNonCourter
PropTimeViewingCourter
ChoiceTimeCourter
ChoiceTimeNonCourter
TotalTime
PropChoiceTimeCourter
CourtshipDisplays
FemaleLength
FocalMaleLength
FocalMaleColourScore
CourterMaleLength
CourterMaleColourScore
NonCourterMaleLength
NonCourterMaleColourScore
DitherMaleLength
DitherMaleColourScore
ControlStimulusMaleLength
ControlStimulusMaleColourScore
Treatment
ViewingTimeCourter
ViewingTimeNonCourter
PropTimeViewingCourter
ChoiceTimeCourter
ChoiceTimeNonCourter
TotalTime
PropChoiceTimeCourter
CourtshipDisplays
FemaleLength
FocalMaleLength
FocalMaleColourScore
CourterMaleLength
CourterMaleColourScore
NonCourterMaleLength
NonCourterMaleColourScore
DitherMaleLength
DitherMaleColourScore
ControlStimulusMaleLength
ControlStimulusMaleColourScore
Treatment
ViewingTimeCourter
ViewingTimeNonCourter
PropTimeViewingCourter
ChoiceTimeCourter
ChoiceTimeNonCourter
TotalTime
PropChoiceTimeCourter
CourtshipDisplays
FemaleLength
FocalMaleLength
FocalMaleColourScore
CourterMaleLength
CourterMaleColourScore
NonCourterMaleLength
NonCourterMaleColourScore
DitherMaleLength
DitherMaleColourScore
ControlStimulusMaleLength
ControlStimulusMaleColourScore
Treatment
ViewingTimeCourter
ViewingTimeNonCourter
PropTimeViewingCourter
ChoiceTimeCourter
ChoiceTimeNonCourter
TotalTime
PropChoiceTimeCourter
CourtshipDisplays
FemaleLength
FocalMaleLength
FocalMaleColourScore
CourterMaleLength
CourterMaleColourScore
NonCourterMaleLength
NonCourterMaleColourScore
DitherMaleLength
DitherMaleColourScore
ControlStimulusMaleLength
ControlStimulusMaleColourScore
Treatment
ViewingTimeCourter
ViewingTimeNonCourter
PropTimeViewingCourter
ChoiceTimeCourter
ChoiceTimeNonCourter
TotalTime
PropChoiceTimeCourter
CourtshipDisplays
FemaleLength
FocalMaleLength
FocalMaleColourScore
CourterMaleLength
CourterMaleColourScore
NonCourterMaleLength
NonCourterMaleColourScore
DitherMaleLength
DitherMaleColourScore
ControlStimulusMaleLength
ControlStimulusMaleColourScore
Treatment
ViewingTimeCourter
ViewingTimeNonCourter
PropTimeViewingCourter
ChoiceTimeCourter
ChoiceTimeNonCourter
TotalTime
PropChoiceTimeCourter
CourtshipDisplays
FemaleLength
FocalMaleLength
FocalMaleColourScore
CourterMaleLength
CourterMaleColourScore
NonCourterMaleLength
NonCourterMaleColourScore
DitherMaleLength
DitherMaleColourScore
ControlStimulusMaleLength
ControlStimulusMaleColourScore
Treatment
ViewingTimeCourter
ViewingTimeNonCourter
PropTimeViewingCourter
ChoiceTimeCourter
ChoiceTimeNonCourter
TotalTime
PropChoiceTimeCourter
CourtshipDisplays
FemaleLength
FocalMaleLength
FocalMaleColourScore
CourterMaleLength
CourterMaleColourScore
NonCourterMaleLength
NonCourterMaleColourScore
DitherMaleLength
DitherMaleColourScore
ControlStimulusMaleLength
ControlStimulusMaleColourScore
Treatment
ViewingTimeCourter
ViewingTimeNonCourter
PropTimeViewingCourter
ChoiceTimeCourter
ChoiceTimeNonCourter
TotalTime
PropChoiceTimeCourter
CourtshipDisplays
FemaleLength
FocalMaleLength
FocalMaleColourScore
CourterMaleLength
CourterMaleColourScore
NonCourterMaleLength
NonCourterMaleColourScore
DitherMaleLength
DitherMaleColourScore
ControlStimulusMaleLength
ControlStimulusMaleColourScore
Treatment
ViewingTimeCourter
ViewingTimeNonCourter
PropTimeViewingCourter
ChoiceTimeCourter
ChoiceTimeNonCourter
TotalTime
PropChoiceTimeCourter
CourtshipDisplays
FemaleLength
FocalMaleLength
FocalMaleColourScore
CourterMaleLength
CourterMaleColourScore
NonCourterMaleLength
NonCourterMaleColourScore
DitherMaleLength
DitherMaleColourScore
ControlStimulusMaleLength
ControlStimulusMaleColourScore
Treatment
ViewingTimeCourter
ViewingTimeNonCourter
PropTimeViewingCourter
ChoiceTimeCourter
ChoiceTimeNonCourter
TotalTime
PropChoiceTimeCourter
CourtshipDisplays
FemaleLength
FocalMaleLength
FocalMaleColourScore
CourterMaleLength
CourterMaleColourScore
NonCourterMaleLength
NonCourterMaleColourScore
DitherMaleLength
DitherMaleColourScore
ControlStimulusMaleLength
ControlStimulusMaleColourScore
Treatment
ViewingTimeCourter
ViewingTimeNonCourter
PropTimeViewingCourter
ChoiceTimeCourter
ChoiceTimeNonCourter
TotalTime
PropChoiceTimeCourter
CourtshipDisplays
FemaleLength
FocalMaleLength
FocalMaleColourScore
CourterMaleLength
CourterMaleColourScore
NonCourterMaleLength
NonCourterMaleColourScore
DitherMaleLength
DitherMaleColourScore
ControlStimulusMaleLength
ControlStimulusMaleColourScore
Treatment
ViewingTimeCourter
ViewingTimeNonCourter
PropTimeViewingCourter
ChoiceTimeCourter
ChoiceTimeNonCourter
TotalTime
PropChoiceTimeCourter
CourtshipDisplays
FemaleLength
FocalMaleLength
FocalMaleColourScore
CourterMaleLength
CourterMaleColourScore
NonCourterMaleLength
NonCourterMaleColourScore
DitherMaleLength
DitherMaleColourScore
ControlStimulusMaleLength
ControlStimulusMaleColourScore
Treatment
ViewingTimeCourter
ViewingTimeNonCourter
PropTimeViewingCourter
ChoiceTimeCourter
ChoiceTimeNonCourter
TotalTime
PropChoiceTimeCourter
CourtshipDisplays
FemaleLength
FocalMaleLength
FocalMaleColourScore
CourterMaleLength
CourterMaleColourScore
NonCourterMaleLength
NonCourterMaleColourScore
DitherMaleLength
DitherMaleColourScore
ControlStimulusMaleLength
ControlStimulusMaleColourScore
Treatment
ViewingTimeCourter
ViewingTimeNonCourter
PropTimeViewingCourter
ChoiceTimeCourter
ChoiceTimeNonCourter
TotalTime
PropChoiceTimeCourter
CourtshipDisplays
FemaleLength
FocalMaleLength
FocalMaleColourScore
CourterMaleLength
CourterMaleColourScore
NonCourterMaleLength
NonCourterMaleColourScore
DitherMaleLength
DitherMaleColourScore
ControlStimulusMaleLength
ControlStimulusMaleColourScore
Treatment
ViewingTimeCourter
ViewingTimeNonCourter
PropTimeViewingCourter
ChoiceTimeCourter
ChoiceTimeNonCourter
TotalTime
PropChoiceTimeCourter
CourtshipDisplays
FemaleLength
FocalMaleLength
FocalMaleColourScore
CourterMaleLength
CourterMaleColourScore
NonCourterMaleLength
NonCourterMaleColourScore
DitherMaleLength
DitherMaleColourScore
ControlStimulusMaleLength
ControlStimulusMaleColourScore
Treatment
ViewingTimeCourter
ViewingTimeNonCourter
PropTimeViewingCourter
ChoiceTimeCourter
ChoiceTimeNonCourter
TotalTime
PropChoiceTimeCourter
CourtshipDisplays
FemaleLength
FocalMaleLength
FocalMaleColourScore
CourterMaleLength
CourterMaleColourScore
NonCourterMaleLength
NonCourterMaleColourScore
DitherMaleLength
DitherMaleColourScore
ControlStimulusMaleLength
ControlStimulusMaleColourScore
Treatment
ViewingTimeCourter
ViewingTimeNonCourter
PropTimeViewingCourter
ChoiceTimeCourter
ChoiceTimeNonCourter
TotalTime
PropChoiceTimeCourter
CourtshipDisplays
FemaleLength
FocalMaleLength
FocalMaleColourScore
CourterMaleLength
CourterMaleColourScore
NonCourterMaleLength
NonCourterMaleColourScore
DitherMaleLength
DitherMaleColourScore
ControlStimulusMaleLength
ControlStimulusMaleColourScore
Treatment
ViewingTimeCourter
ViewingTimeNonCourter
PropTimeViewingCourter
ChoiceTimeCourter
ChoiceTimeNonCourter
TotalTime
PropChoiceTimeCourter
CourtshipDisplays
FemaleLength
FocalMaleLength
FocalMaleColourScore
CourterMaleLength
CourterMaleColourScore
NonCourterMaleLength
NonCourterMaleColourScore
DitherMaleLength
DitherMaleColourScore
ControlStimulusMaleLength
ControlStimulusMaleColourScore
Treatment
ViewingTimeCourter
ViewingTimeNonCourter
PropTimeViewingCourter
ChoiceTimeCourter
ChoiceTimeNonCourter
TotalTime
PropChoiceTimeCourter
CourtshipDisplays
FemaleLength
FocalMaleLength
FocalMaleColourScore
CourterMaleLength
CourterMaleColourScore
NonCourterMaleLength
NonCourterMaleColourScore
DitherMaleLength
DitherMaleColourScore
ControlStimulusMaleLength
ControlStimulusMaleColourScore
Treatment
ViewingTimeCourter
ViewingTimeNonCourter
PropTimeViewingCourter
ChoiceTimeCourter
ChoiceTimeNonCourter
TotalTime
PropChoiceTimeCourter
CourtshipDisplays
FemaleLength
FocalMaleLength
FocalMaleColourScore
CourterMaleLength
CourterMaleColourScore
NonCourterMaleLength
NonCourterMaleColourScore
DitherMaleLength
DitherMaleColourScore
ControlStimulusMaleLength
ControlStimulusMaleColourScore
Treatment
ViewingTimeCourter
ViewingTimeNonCourter
PropTimeViewingCourter
ChoiceTimeCourter
ChoiceTimeNonCourter
TotalTime
PropChoiceTimeCourter
CourtshipDisplays
FemaleLength
FocalMaleLength
FocalMaleColourScore
CourterMaleLength
CourterMaleColourScore
NonCourterMaleLength
NonCourterMaleColourScore
DitherMaleLength
DitherMaleColourScore
ControlStimulusMaleLength
ControlStimulusMaleColourScore
Treatment
ViewingTimeCourter
ViewingTimeNonCourter
PropTimeViewingCourter
ChoiceTimeCourter
ChoiceTimeNonCourter
TotalTime
PropChoiceTimeCourter
CourtshipDisplays
FemaleLength
FocalMaleLength
FocalMaleColourScore
CourterMaleLength
CourterMaleColourScore
NonCourterMaleLength
NonCourterMaleColourScore
DitherMaleLength
DitherMaleColourScore
ControlStimulusMaleLength
ControlStimulusMaleColourScore
Treatment
ViewingTimeCourter
ViewingTimeNonCourter
PropTimeViewingCourter
ChoiceTimeCourter
ChoiceTimeNonCourter
TotalTime
PropChoiceTimeCourter
CourtshipDisplays
FemaleLength
FocalMaleLength
FocalMaleColourScore
CourterMaleLength
CourterMaleColourScore
NonCourterMaleLength
NonCourterMaleColourScore
DitherMaleLength
DitherMaleColourScore
ControlStimulusMaleLength
ControlStimulusMaleColourScore
Treatment
ViewingTimeCourter
ViewingTimeNonCourter
PropTimeViewingCourter
ChoiceTimeCourter
ChoiceTimeNonCourter
TotalTime
PropChoiceTimeCourter
CourtshipDisplays
FemaleLength
FocalMaleLength
FocalMaleColourScore
CourterMaleLength
CourterMaleColourScore
NonCourterMaleLength
NonCourterMaleColourScore
DitherMaleLength
DitherMaleColourScore
ControlStimulusMaleLength
ControlStimulusMaleColourScore
Treatment
ViewingTimeCourter
ViewingTimeNonCourter
PropTimeViewingCourter
ChoiceTimeCourter
ChoiceTimeNonCourter
TotalTime
PropChoiceTimeCourter
CourtshipDisplays
FemaleLength
FocalMaleLength
FocalMaleColourScore
CourterMaleLength
CourterMaleColourScore
NonCourterMaleLength
NonCourterMaleColourScore
DitherMaleLength
DitherMaleColourScore
ControlStimulusMaleLength
ControlStimulusMaleColourScore
Treatment
ViewingTimeCourter
ViewingTimeNonCourter
PropTimeViewingCourter
ChoiceTimeCourter
ChoiceTimeNonCourter
TotalTime
PropChoiceTimeCourter
CourtshipDisplays
FemaleLength
FocalMaleLength
FocalMaleColourScore
CourterMaleLength
CourterMaleColourScore
NonCourterMaleLength
NonCourterMaleColourScore
DitherMaleLength
DitherMaleColourScore
ControlStimulusMaleLength
ControlStimulusMaleColourScore
Treatment
ViewingTimeCourter
ViewingTimeNonCourter
PropTimeViewingCourter
ChoiceTimeCourter
ChoiceTimeNonCourter
TotalTime
PropChoiceTimeCourter
CourtshipDisplays
FemaleLength
FocalMaleLength
FocalMaleColourScore
CourterMaleLength
CourterMaleColourScore
NonCourterMaleLength
NonCourterMaleColourScore
DitherMaleLength
DitherMaleColourScore
ControlStimulusMaleLength
ControlStimulusMaleColourScore
Treatment
ViewingTimeCourter
ViewingTimeNonCourter
PropTimeViewingCourter
ChoiceTimeCourter
ChoiceTimeNonCourter
TotalTime
PropChoiceTimeCourter
CourtshipDisplays
FemaleLength
FocalMaleLength
FocalMaleColourScore
CourterMaleLength
CourterMaleColourScore
NonCourterMaleLength
NonCourterMaleColourScore
DitherMaleLength
DitherMaleColourScore
ControlStimulusMaleLength
ControlStimulusMaleColourScore
Treatment
ViewingTimeCourter
ViewingTimeNonCourter
PropTimeViewingCourter
ChoiceTimeCourter
ChoiceTimeNonCourter
TotalTime
PropChoiceTimeCourter
CourtshipDisplays
FemaleLength
FocalMaleLength
FocalMaleColourScore
CourterMaleLength
CourterMaleColourScore
NonCourterMaleLength
NonCourterMaleColourScore
DitherMaleLength
DitherMaleColourScore
ControlStimulusMaleLength
ControlStimulusMaleColourScore
Treatment
ViewingTimeCourter
ViewingTimeNonCourter
PropTimeViewingCourter
ChoiceTimeCourter
ChoiceTimeNonCourter
TotalTime
PropChoiceTimeCourter
CourtshipDisplays
FemaleLength
FocalMaleLength
FocalMaleColourScore
CourterMaleLength
CourterMaleColourScore
NonCourterMaleLength
NonCourterMaleColourScore
DitherMaleLength
DitherMaleColourScore
ControlStimulusMaleLength
ControlStimulusMaleColourScore
Treatment
ViewingTimeCourter
ViewingTimeNonCourter
PropTimeViewingCourter
ChoiceTimeCourter
ChoiceTimeNonCourter
TotalTime
PropChoiceTimeCourter
CourtshipDisplays
FemaleLength
FocalMaleLength
FocalMaleColourScore
CourterMaleLength
CourterMaleColourScore
NonCourterMaleLength
NonCourterMaleColourScore
DitherMaleLength
DitherMaleColourScore
ControlStimulusMaleLength
ControlStimulusMaleColourScore
Treatment
ViewingTimeCourter
ViewingTimeNonCourter
PropTimeViewingCourter
ChoiceTimeCourter
ChoiceTimeNonCourter
TotalTime
PropChoiceTimeCourter
CourtshipDisplays
FemaleLength
FocalMaleLength
FocalMaleColourScore
CourterMaleLength
CourterMaleColourScore
NonCourterMaleLength
NonCourterMaleColourScore
DitherMaleLength
DitherMaleColourScore
ControlStimulusMaleLength
ControlStimulusMaleColourScore
Treatment
ViewingTimeCourter
ViewingTimeNonCourter
PropTimeViewingCourter
ChoiceTimeCourter
ChoiceTimeNonCourter
TotalTime
PropChoiceTimeCourter
CourtshipDisplays
FemaleLength
FocalMaleLength
FocalMaleColourScore
CourterMaleLength
CourterMaleColourScore
NonCourterMaleLength
NonCourterMaleColourScore
DitherMaleLength
DitherMaleColourScore
ControlStimulusMaleLength
ControlStimulusMaleColourScore
Treatment
ViewingTimeCourter
ViewingTimeNonCourter
PropTimeViewingCourter
ChoiceTimeCourter
ChoiceTimeNonCourter
TotalTime
PropChoiceTimeCourter
CourtshipDisplays
FemaleLength
FocalMaleLength
FocalMaleColourScore
CourterMaleLength
CourterMaleColourScore
NonCourterMaleLength
NonCourterMaleColourScore
DitherMaleLength
DitherMaleColourScore
ControlStimulusMaleLength
ControlStimulusMaleColourScore
Treatment
ViewingTimeCourter
ViewingTimeNonCourter
PropTimeViewingCourter
ChoiceTimeCourter
ChoiceTimeNonCourter
TotalTime
PropChoiceTimeCourter
CourtshipDisplays
FemaleLength
FocalMaleLength
FocalMaleColourScore
CourterMaleLength
CourterMaleColourScore
NonCourterMaleLength
NonCourterMaleColourScore
DitherMaleLength
DitherMaleColourScore
ControlStimulusMaleLength
ControlStimulusMaleColourScore
Treatment
ViewingTimeCourter
ViewingTimeNonCourter
PropTimeViewingCourter
ChoiceTimeCourter
ChoiceTimeNonCourter
TotalTime
PropChoiceTimeCourter
CourtshipDisplays
FemaleLength
FocalMaleLength
FocalMaleColourScore
CourterMaleLength
CourterMaleColourScore
NonCourterMaleLength
NonCourterMaleColourScore
DitherMaleLength
DitherMaleColourScore
ControlStimulusMaleLength
ControlStimulusMaleColourScore
Treatment
ViewingTimeCourter
ViewingTimeNonCourter
PropTimeViewingCourter
ChoiceTimeCourter
ChoiceTimeNonCourter
TotalTime
PropChoiceTimeCourter
CourtshipDisplays
FemaleLength
FocalMaleLength
FocalMaleColourScore
CourterMaleLength
CourterMaleColourScore
NonCourterMaleLength
NonCourterMaleColourScore
DitherMaleLength
DitherMaleColourScore
ControlStimulusMaleLength
ControlStimulusMaleColourScore
